# Supplementary material
Source: PubMed Central journal article supplement (PMC9260640)
Supplement: jamasurg-e222612-s001.pdf [file jamasurg-e222612-s001.pdf]

## Supplemental Online Content

Johannesson L, Richards E, Reddy V, et al. The first 5 years of uterus transplant in the US: a report from the United States Uterus Transplant Consortium. *JAMA Surg*. Published online July 6, 2022. doi:10.1001/jamasurg.2022.2612

**eTable 1.** Patient Complication List

**eTable 2.** Cytomegalovirus (CMV) Viremia Infection Cases

This supplementary material has been provided by the authors to give readers additional information about their work.

**eTable 1.** Patient Complication List

| Chronological recipient number at respective center | Year of UTx | Operative and postoperative complications            | Reoperation                              | Pregnancy complications     |
|-----------------------------------------------------|-------------|------------------------------------------------------|------------------------------------------|-----------------------------|
| ≤5                                                  | 2016        | Graft failure                                        | Yes (graft hysterectomy)                 | N/A                         |
| ≤5                                                  | 2016        | Graft failure                                        | Yes (graft hysterectomy)                 | N/A                         |
| ≤5                                                  | 2016        | Graft failure                                        | Yes (graft hysterectomy)                 | N/A                         |
| ≤5                                                  | 2016        | Graft failure, UTI                                   | Yes (graft hysterectomy)                 | N/A                         |
| ≤5                                                  | 2016        | UTI                                                  | No                                       | No                          |
| ≤5                                                  | 2016        | UTI                                                  | No                                       | No                          |
| ≤5                                                  | 2017        | No                                                   | No                                       | Placenta accreta            |
| ≤5                                                  | 2018        | Unilateral external iliac thrombosis                 | No                                       | GHTN , GDM, PreE            |
| ≤5                                                  | 2019        | Thrombophlebitis                                     | No                                       | GHTN                        |
| ≤5                                                  | 2019        | Pelvic hematoma, DVT, PE                             | Yes (IVC filter, explorative laparotomy) | cHTN, subchorionic hematoma |
| ≤5                                                  | 2019        | CMV                                                  | No                                       | N/A                         |
| ≤5                                                  | 2019        | Graft failure                                        | Yes (graft hysterectomy)                 | N/A                         |
| ≤5                                                  | 2020        | Cystotomy                                            | No                                       | GHTN, PreE                  |
| 6-10                                                | 2017        | Cystotomy                                            | No                                       | GHTN                        |
| 6-10                                                | 2017        | No                                                   | No                                       | GDM                         |
| 6-10                                                | 2017        | Graft failure                                        | Yes (graft hysterectomy)                 | N/A                         |
| 6-10                                                | 2018        | No                                                   | No                                       | CI                          |
| 6-10                                                | 2018        | Graft failure                                        | Yes (graft hysterectomy)                 | N/A                         |
| 6-10                                                | 2019        | Tachycardia                                          | Yes (explorative laparotomy)             | GDM, PPRM                   |
| 6-10                                                | 2019        | Incisional hematoma                                  | No                                       | N/A                         |
| 6-10                                                | 2020        | No                                                   | No                                       | No                          |
| ≥11                                                 | 2018        | Cystotomy                                            | No                                       | No                          |
| ≥11                                                 | 2018        | No                                                   | No                                       | CI                          |
| ≥11                                                 | 2018        | No                                                   | No                                       | No                          |
| ≥11                                                 | 2018        | Graft failure, Acute pneumothorax, Acute blood loss. | Yes (graft hysterectomy)                 | N/A                         |
| ≥11                                                 | 2019        | No                                                   | No                                       | PreE                        |
| ≥11                                                 | 2019        | No                                                   | No                                       | GHTN, Polyhydramnios        |
| ≥11                                                 | 2019        | Cystotomy                                            | No                                       | N/A                         |
| ≥11                                                 | 2019        | UTI                                                  | No                                       | Placenta Previa             |

|     |      |     |    |                     |
|-----|------|-----|----|---------------------|
| ≥11 | 2019 | CMV | No | Elevated creatinine |
| ≥11 | 2019 | No  | No | Vaginal bleeding    |
| ≥11 | 2021 | No  | No | No                  |
| ≥11 | 2021 | No  | No | N/A                 |

UTI-Urinary tract infection, GHTN-Gestational hypertension, GDM-Gestational diabetes mellitus, PreE-Pre-eclampsia, cHTN-Chronic hypertension, CMV-Cytomegalovirus, CI- Cervical incompetence, IVC- Inferior vena cava

**eTable 2.** Cytomegalovirus (CMV) Viremia Infection Cases

|                         |              | <b>Recipients</b> | <b>Donors</b> |
|-------------------------|--------------|-------------------|---------------|
| <b>CMV Seropositive</b> |              | 78%               | 55%           |
| <b>CMV Seronegative</b> |              | 22%               | 45%           |
|                         |              |                   |               |
| <b>Recipient</b>        | <b>Donor</b> | <b>Proportion</b> |               |
| +                       | +            | 52%*              |               |
| -                       | -            | 21%               |               |
| +                       | -            | 21%               |               |
| -                       | +            | 6%*               |               |

\*designates a case of CMV viremia occurred in this setting
